1 **The lived experience of rejection sensitivity in ADHD - a qualitative exploration**

2

3 Annabel Rowney-Smith<sup>1</sup>, Beth Sutton<sup>2,3</sup>, Lisa Quadt<sup>1,3</sup>, Jessica A Eccles<sup>1,3,\*</sup>

4

5 1 Department of Clinical Neuroscience, Brighton & Sussex Medical School,

6 University of Sussex, Brighton, UK

7 2 School of Global Studies, University of Sussex, Brighton, UK

8 3 Sussex Partnership NHS Foundation Trust, Worthing, UK

9

10 Short title: Rejection sensitivity in ADHD

11

12 \* Corresponding Author

13 Dr Jessica Eccles

14 Trafford Centre

15 University of Sussex

16 BN1 9RY

17 Brighton

18 United Kingdom

19 [J.Eccles@bsms.ac.uk](mailto:J.Eccles@bsms.ac.uk)

20

21

## Abstract

22 Attention Deficit Hyperactivity Disorder (ADHD) is a neurodevelopmental condition,  
23 commonly associated with differences in attention, and/or hyperactivity and  
24 impulsiveness. A lesser known, but highly impactful characteristic of ADHD is  
25 emotional dysregulation, which causes difficulties in emotional expression and  
26 identification. An aspect of emotional dysregulation which remains relatively  
27 unexplored in ADHD, is rejection sensitivity. In people who experience rejection  
28 sensitivity, perceived rejection and/or criticism can evoke extreme dysphoria. To  
29 investigate the lived experience of rejection sensitivity in ADHD individuals, five  
30 undergraduates participated in focus-group interviews. The subsequent thematic  
31 analysis revealed three key themes which encapsulated the experience; *withdrawal*,  
32 *masking*, and *bodily sensations*. The participants explained how rejection sensitivity  
33 elicited unpleasant bodily sensations, anxiety, and misery, and how, in turn, they  
34 used masking to camouflage these feelings. They then discussed how the use of  
35 masking had caused them to become dissociated from themselves and to withdraw  
36 from others, which often resulted in loneliness. It was apparent that rejection  
37 sensitivity significantly impacts mental wellbeing, eliciting feelings such as  
38 anxiousness, despair, and embarrassment. In turn, social function is significantly  
39 impaired, alongside career opportunities, and daily life. Our findings indicate a need  
40 for deeper understanding of ADHD traits and emotional dysregulation, which may in  
41 turn lessen the presence of rejection sensitivity in ADHD individuals.

42

43 Keywords: rejection sensitivity, ADHD, emotion

44

## Introduction

45 ADHD is a neurodevelopmental condition, characterised by differences in attention  
46 and emotion regulation, possible hyperactivity, and impulsiveness (1). The  
47 neurodiversity movement (2) advocates that neurodevelopmental conditions are  
48 often inseparable from one's identity (3). Thus, to align our research with the  
49 neurodiversity movement's values, the language in this paper is henceforth adapted  
50 to avoid the perpetuation of ableist stances. For example, medicalised language will  
51 be avoided, e.g., 'traits' instead of 'symptoms', and identity-first language will be  
52 used instead of person-first language (e.g., 'ADHD person', or 'ADHDer', instead of  
53 'person with ADHD').

54 Emotional dysregulation is overrepresented in ADHD and may be prevalent in up to  
55 70% of ADHD adults (4). emotional dysregulation is multi-dimensional, but often  
56 presents as increased and/or reduced emotional reactivity, lack of emotional  
57 awareness, and intense emotional expression (5). Consequently, ADHDers may  
58 experience an array of emotional dysregulation-related symptoms, including intense  
59 mood swings, and reactivity to seemingly benign situations. Thus, emotional  
60 dysregulation is thought to significantly contribute to psycho-social problems more  
61 often faced by ADHD people, such as unemployment and interpersonal issues (6)  
62 and has been found to be more negatively influential on quality of life than inattentive  
63 and hyperactivity traits (7). Despite its common association with ADHD, and its  
64 significant effects, emotional dysregulation remains an often-neglected trait, which is  
65 evidenced in its exclusion from diagnostic criteria (8). In recent years, anecdotal  
66 reports have highlighted a crucial dimension of emotional dysregulation experienced  
67 by ADHD people; rejection sensitivity (9).

68 Rejection sensitivity is defined as dysphoria induced by perceived or real rejection,  
69 and/or criticism (9). People who experience rejection sensitivity readily detect

70 rejection, and therefore perceive rejection/criticism more frequently than others (10).  
71 The ensuing dysphoric episode often involves intense feelings of extreme misery,  
72 anxiety, and pain (11). The source of rejection sensitivity is disputed, however;  
73 evidence suggests that childhood interpersonal trauma, such as caregiver rejection,  
74 may contribute to causality (12). Although rejection sensitivity is defined as a  
75 personality disposition (13), it frequently features in mental health disorders typically  
76 characterised by emotional dysregulation, such as depression, Body Dysmorphic  
77 Disorder, and Borderline Personality Disorder (14).

78 To date, few studies have investigated the potential association between ADHD and  
79 rejection sensitivity. Moreover, these studies, for the most part, have attempted to  
80 establish the *extent* of the rejection sensitivity -ADHD association, rather than  
81 explore the *nature* of the association. However, although they did not directly  
82 measure rejection sensitivity, one study (15) explored the experience of received  
83 criticism in an ADHD population, via qualitative techniques (open-ended written  
84 responses).

85 Since emotional dysregulation presents as a significant influence on quality of life for  
86 ADHDers, and rejection sensitivity may be a contributing factor in this, there is an  
87 obvious need for more research exploring the experience of rejection sensitivity in  
88 ADHD cohorts. Motivated by this gap in existing research, our study aimed to  
89 provide rich accounts of rejection sensitivity in an ADHD population, via qualitative  
90 methods; focus-group interviews and subsequent thematic analysis. We hope that  
91 this research will improve the understanding of neurodivergent experiences and  
92 shed light on the co-occurrence between rejection sensitivity and ADHD.

93

94

## **Methods**

### **Measures**

96 To explore the lived experience of rejection sensitivity, a qualitative study design was  
97 utilised; focus groups interviews. This approach was selected with the aim of  
98 capturing a rich, and illustrative collection of perspectives, as participants can  
99 explore and discuss their experiences alongside like-minded peers, and with limited  
100 restriction. At the start of the focus groups, informed verbal consent was gained from  
101 the participants, and time was allocated for introductions. The interviews were lightly  
102 structured by a topic guide which comprised one broad, open-ended question with  
103 associated sub-questions. The broad, over-arching question was aimed to frame the  
104 ensuing discourse; *“If you do, how do you identify with Rejection Sensitive  
105 Dysphoria?”*; whereas the associated sub-questions were intended to encourage  
106 participants’ engagement with the topic, and included questions such as, *“Has  
107 rejection sensitivity D interfered with your daily life?”*, and *“Do you experience any  
108 particular feelings when you are experiencing rejection sensitivity D?”*. To increase  
109 accessibility, the focus groups were conducted via online video-call, through Zoom.

### **Participants**

111 Five undergraduate students were recruited from the University of Sussex, via flyers  
112 distributed across the university campus. To participate in the study, participants had  
113 to satisfy inclusion/exclusion criteria; all participants were undergraduates with  
114 formal ADHD diagnoses and were over 18 years old. The participants were also  
115 incentivised to take part, via a £16 GiftPay voucher. Two focus group interviews took  
116 place, whereby one group contained two participants, and one group contained  
117 three. Participants were sent a copy of the consent form and an information sheet

118 prior to providing verbal consent, to allow adequate understanding of the study  
119 expectations and the research process.

## 120 **Analysis**

121 The focus group content was audio-recorded via a Dictaphone and transcribed  
122 verbatim into written text. Following this, the transcribed data was analysed and  
123 interpreted, informed by Braun and Clarke's (16) six-step thematic analysis  
124 framework (16). To promote familiarity with the data, the focus-group transcriptions  
125 were firstly read multiple times. Next, seemingly important data were identified, and  
126 then organised into themes according to patterns of similarity. The potential themes  
127 were then discussed and reviewed amongst the research team, whereby three  
128 defined themes emerged; *masking*, *withdrawal*, and *bodily sensations*. Two themes  
129 (*problems with self-esteem* and *cognitions*) were rejected because they overlapped  
130 with the other themes, and were determined as subthemes of our three defined  
131 themes.

132 Our study method was devised by University of Sussex researchers and  
133 undergraduate students alike, with neurodivergent perspectives.

134 Ethical approval for this study was obtained by the Research Governance and Ethics  
135 Committee at Brighton and Sussex Medical School (application no. ER/AR649/1).

136 Data was collected between 25<sup>th</sup> July 2022 and 2<sup>nd</sup> September 2022.

## 137 **Results**

138 Participants spoke in depth about their feelings, thought processes, and physical  
139 experiences before, during, and after rejection/criticism. In commonality, they  
140 described rejection sensitivity as a painful and overwhelming experience, which often

141 lasts a significant amount of time (between hours and weeks) and can resurface  
142 many years later. Three primary themes emerged from the data; *masking*,  
143 *withdrawal*, and *bodily sensations* (Fig. 1).

144 **[Figure 1 here]**

145 Figure 1: Three primary themes

146

147 **Withdrawal**

148 One of the most common themes identified was ‘withdrawal’. The participants  
149 explained that rejection sensitivity often caused them to withdraw from friendships,  
150 family and romantic relationships, university life, and job opportunities. All  
151 participants agreed that the *expectation* of rejection elicited more dysphoria than the  
152 rejection *itself*; “there’s a general idea that I will be rejected”. Thus, participants  
153 reported to pre-emptively withdraw to avoid potential rejection; “I just get myself out  
154 of the situation where the rejection might come, just to avoid it”.

155 Participants discussed how withdrawal negatively impacts their relationships with  
156 friends and family. It was disclosed that they “rarely reach out” to people, and that  
157 when they *do* contact people, they consistently assess for possible  
158 rejection/criticism. For instance, they may assume that an unanswered text message  
159 is a rejection; “I just ended up being awake until four in the morning... like constantly  
160 checking my phone, being like, why was this person not responding?”. Therefore,  
161 participants explained that it is easier to avoid contacting people, as this pre-  
162 emptively lessen rejection sensitivity anxiety. In turn, their quantity and quality of  
163 relationships is negatively impacted. One participant expressed that there were  
164 “limited people in my life that I’m close with”. Similarly, another participant shared  
165 that they keep their “friendship circles low and full of neurodivergent people” as they

166 had suffered “so much rejection from allistic people”. Consequently, participants  
167 disclosed how they often felt “lonely”, “friendless”, and “unlovable”.

168 Withdrawal also affects participants’ university work; most participants agreed that  
169 the fear of rejection/criticism had caused them to delay, or not submit assignments.  
170 A few participants admitted that in order to protect themselves from criticism, they  
171 had purposefully submitted university work which was below their usual standard, or  
172 had submitted it late (which typically incurs a 10% grade deduction). They explained  
173 that this allowed them an explanation for potential rejection/criticism in the form of a  
174 disappointing grade. Focus group members also discussed withdrawal from the  
175 workplace. One participant had avoided applying for career opportunities “to avoid  
176 rejection”. Interestingly, participants explained how they often experienced rejection  
177 sensitivity during the application process, as opposed to when they *received* the  
178 rejection. This conforms with the earlier assertion, that the expectation of rejection “is  
179 more damaging than the actual rejection”. Participants discussed that they do not  
180 feel they deserve good university grades or successful job applications, with one  
181 participant employing the term; “imposter syndrome”.

## 182 **Masking**

183 Masking is often utilised by neurodivergent people to suppress and camouflage  
184 neurodivergent traits (17). This is achieved via the employment of multiple tools  
185 (both consciously and sub-consciously), and subsequent alterations in behaviour  
186 (17). Most participants, either explicitly or implicitly, used masking to camouflage  
187 their thoughts and feelings about a perceived rejection/critique. The participants  
188 discussed their individual difficulties with distinguishing between “real” and their  
189 perceived rejection. A participant provided an example of this; they explained that



190 they could not differentiate between jokes and critiques. Thus, participants explained  
191 that they often felt the need to ask friends/family for clarification and/or reassurance.  
192 However, this often led to embarrassment, anxiety, invalidation, and labels such as  
193 “oversensitive”. To avoid this, participants mask to convey robustness, and a  
194 nonchalant attitude to rejection; “a mask of toughness”. This enables them to hide  
195 their rejection sensitivity from others and helps them feel less like an outsider, and  
196 while it helps them temporarily feel like an outsider, participants agreed that masking  
197 has negative consequences.

198 Participants revealed that consistent masking causes disconnection from their  
199 emotions and their authentic selves, as they struggle to distinguish between real and  
200 faux feelings; “I think at some point it’s not just masking towards others, but you are  
201 also masking with yourself... you can’t identify if you’re bothered or not, because you  
202 lose connection”. Participants also described how masking caused them to feel  
203 disconnected from social interaction; “observing this interaction that’s happening to  
204 you”. One participant disclosed how they had benefitted from therapy, because it  
205 enabled them to identify and reconnect with their emotions. The participants also  
206 explained that masking perpetuates their social withdrawal. Two participants  
207 described this as a “vicious circle”, whereby others take advantage of their  
208 nonchalant mask, and often incorrectly assume that rejection and criticism does not  
209 affect them. Consequently, rejections and critiques increase, and they subsequently  
210 withdraw further from social situations, and further reinforce the mask; a vicious  
211 circle.

## 212 **Bodily Sensations**

213 Participants described how perceived rejection evokes overwhelming and  
214 unpleasant bodily sensations. Interestingly, sensations were varied and unique to the  
215 individual. For example, one participant felt sensations in their heart and throat; “it’s  
216 like a pinch in your heart, like a very swift, brief, like, like your heart or like your throat  
217 closing up... feels like your heart kind of drops maybe a bit”. Another participant  
218 explained how they felt as if “a chair (had) been taken out from beneath you”. One  
219 participant used a powerful metaphor to explain the flooding of heat throughout their  
220 body; “you know the hand warmers, when you click, it becomes solid and warm...  
221 getting warmer inside me.... everything inside me starts to burn”. In contrast, a  
222 participant discussed how they felt their body enter a “paralysed state”. Stomach  
223 sensations were the only sensation common amongst participants; “sick to your  
224 stomach”, and nausea “in my gut”.

225 Figure 1 here

226 Figure 1. Graphic depicting the key themes in the analysis of rejection sensitivity in  
227 ADHD

228

## 229 **Discussion**

230 Our findings indicate that rejection sensitivity is a multidimensional experience;  
231 encompassing emotional pain, negative cognitions, and unpleasant physical  
232 sensations. Our participants explained how the effects of rejection sensitivity, like  
233 anxiety, depression, and unpleasant bodily sensations, had led them to mask their  
234 true feelings, and withdraw from relationships and work/university commitments. It

235 was apparent that rejection sensitivity is detrimental to mental health, and impairs  
236 both daily function and long-term wellbeing.

237 The findings also indicate that rejection sensitivity could be a contributing factor in  
238 the psychosocial problems often faced by ADHDers. For example, the participants  
239 explained how they are less likely to apply for jobs or submit university assignments  
240 because they were expecting rejection and were protecting themselves from the  
241 ensuing misery of rejection sensitivity. This concern could potentially limit their job  
242 prospects, and any future career aspirations. Furthermore, subsequent withdrawal  
243 from relationships may restrict opportunities to find a romantic partner and friends,  
244 and in extreme cases, could lead to familial estrangement. Again, this could  
245 contribute to psychosocial problems, as ADHDers may find themselves without a  
246 support network, and may find it hard to start families of their own. Thus, the effects  
247 of rejection sensitivity are far-reaching, and could prove long-term. Previous  
248 research has primarily focussed on how ADHD traits affect psychosocial functioning,  
249 yet our findings suggest that rejection sensitivity may be just as important in the  
250 development of psychosocial issues.

251 The participants spoke at length about how their withdrawal from friends and family  
252 had left them lonely and isolated. Research has found that ADHDers are more likely  
253 to experience loneliness than those without ADHD (18), and rejection sensitivity -  
254 masking may contribute to this. Moreover, research also indicates that masking  
255 threatens the development and maintenance of deep relationships. Bradley et al.  
256 found that masking made their autistic participants feel disingenuous because their  
257 relationships were based on an untrue representation of themselves (19). Their  
258 participants felt that their relationships with others were based on deception, and that  
259 very few people truly knew who they truly were. This is echoed in our study, when

260 our participants expressed how they use masking to present themselves as tougher  
261 than they are, which, in turn, made others feel as if they could continue to exploit  
262 them, not knowing the devastating consequences for the participants' mental health.  
263 This may further contribute to the participants' withdrawal from relationships with  
264 others, as they may find their relationships unfulfilling, shallow, and based on  
265 deception. A study conducted by Houghton et al. (20) corroborates this, as they  
266 found that ADHDers often report their friendships as low quality (20). They also  
267 found that loneliness mediates the often-co-occurrent depressive disorders in ADHD  
268 (20). rejection sensitivity could form part of the driving force behind the high  
269 prevalence of loneliness and depression in ADHD people, as it may cause ADHDers  
270 to have superficial friendships, and withdraw from developing and maintaining  
271 relationships.

272 Our participants disclosed how their extensive use of masking had caused them to  
273 feel dissociated from themselves; one participant explained how they needed  
274 therapy to re-identify their true self. Dissociation is often allied with mental health  
275 disorders like bipolar disorder (21) and borderline personality disorder (BPD) (22),  
276 which are both common ADHD-co-occurrent conditions (23, 24). It may be that  
277 rejection sensitivity -masking contributes to the development of bipolar disorder  
278 and/or BPD in ADHDers through its dissociative consequences. For instance, our  
279 participants discussed how they felt that masking had led them astray from their true  
280 identities, leading them on to question who they really are. This unstable self-image  
281 and de-personalisation is also frequently seen in people with bipolar disorder and  
282 BPD. Furthermore, since BPD sufferers are more likely to experience unstable  
283 relationships (25), rejection sensitivity -related withdrawal from relationships may  
284 *also* contribute to BPD symptoms. Unfortunately, due to symptoms overlap (primarily

285 emotional dysregulation-related), ADHD is often misdiagnosed as BPD, especially in  
286 females (26). It may be that either rejection sensitivity -masking and withdrawal  
287 contributes to the *development* of BPD in ADHDers, or they may also be distinct  
288 features of ADHD, which would contribute to the *misdiagnosis* of BPD.

289 To our knowledge, the unpleasant bodily sensations felt by the participants was a  
290 new finding in the context of rejection sensitivity. We found that these sensations  
291 varied greatly amongst the participants; each participant experienced different  
292 physical sensations in different bodily areas. For example, one participant primarily  
293 felt nausea in their stomach and gut, whereas another felt that their heart and throat  
294 were tightening. Additionally, we found that rejection sensitivity affects the perception  
295 of bodily temperature, when one participant explained that rejection sensitivity  
296 evoked the feeling of progressively intense heat throughout their body. Conversely,  
297 rejection sensitivity also appeared to *inhibit* the feeling of physical sensation, when  
298 one participant explained that rejection sensitivity causes them to feel paralysed.  
299 These types of bodily sensations are often found in anxiety disorders, and may  
300 reflect an anxiety attack. Anxiety attacks are caused by activation of the sympathetic  
301 nervous system, which effectively causes the body to enter a fight-or-flight  
302 physiological state (27 p. 189–190). This affects multiple bodily systems, often  
303 resulting in various symptoms, such as nausea, feelings of warmth or cold, chest  
304 tightness, and abdominal pain (27 p. 189–190). It may be that rejection sensitivity  
305 elicits a stress response in ADHDers, which may contribute to the often co-occurrent  
306 diagnosis of anxiety disorders.

307 Perhaps the most insightful and important notion to arise from our participants'  
308 honesty, is the idea that rejection sensitivity could be prevented or alleviated if they  
309 received more understanding and empathy from others. The participants expressed

310 that they consistently felt they needed reassurance from others to be able to help  
311 alleviate rejection sensitivity symptoms. They explained that if they did not receive  
312 the reassurance they needed, their rejection sensitivity -related anxiety would  
313 “spiral”, because they would repeatedly analyse the rejection sensitivity -provoking  
314 situation; trying to work out if they had been rejected or not. However, they often felt  
315 embarrassed to ask for reassurance, because they did not want to present as  
316 annoying or as overly sensitive. This was mainly due to previous negative  
317 experiences, whereby asking for reassurance was followed by judgement from  
318 others. Thus, gaining reassurance was a *double-edged sword*; seeking reassurance  
319 induced feelings of embarrassment and judgement, and alternatively, not seeking  
320 reassurance induced anxiety. This may also contribute to withdrawal from  
321 relationships, as participants may wish to avoid the consequences of either decision.  
322 This finding indicates that more understanding and empathy from others may  
323 mediate the severity of rejection sensitivity, whereby ADHDers would not need to  
324 mask as much, and would potentially be able to socialise more without such negative  
325 consequences for their mental health.

326 Although our findings provide a rich insight into the experience of rejection  
327 sensitivity, they do not elucidate the aetiology of rejection sensitivity . However, it  
328 may be that rejection sensitivity develops as a result of sensitisation to sustained  
329 criticism. Due to lack of knowledge and understanding of trait aetiology, ADHD is  
330 classically stigmatised (28). ADHD traits may contravene social norms and can  
331 appear to others as if they are controllable. For example, neurotypical people are  
332 typically able to control their impulses, such as not interrupting others. This, paired  
333 with misconceptions regarding aetiology, lead to discreditation and prejudice (28).  
334 Thus, ADHD traits are often met with criticism. Since ADHD is present from

335 childhood, ADHD people are more frequently exposed to criticism and rejection from  
336 a young age than neurotypical peers (29). It could be hypothesised that rejection  
337 sensitivity results from sensitisation; whereby the response to upsetting, frequent,  
338 and early experiences of criticism and rejection, become larger and more intense  
339 over time. This fits with the data collected from our focus-groups; the participants  
340 often felt that the anticipation of rejection was more painful than the rejection itself,  
341 indicating that past experience of rejection frames future response. This correlates  
342 with the increasing emotional dysregulation seen from childhood ADHD into  
343 adulthood ADHD (4). This sensitisation theory is corroborated by Babinski et al. (30),  
344 who investigated social feedback circuitry in adolescents with both ADHD and  
345 rejection sensitivity. The authors found that rejection sensitivity symptoms correlated  
346 with sensitisation of attentional neural circuitry for social rejection, and with  
347 desensitisation for positive social feedback (30). Therefore, ADHD people who  
348 experience rejection sensitivity, may be *oversensitive* to rejection cues, and  
349 *desensitised* to social approval cues, due to alterations in neural connections.  
350 Consequently, rejection is perceived more frequently, and is unassuaged by *missed*  
351 social approval cues. Since ADHD is characterised by differences in attention, it may  
352 be that ADHD neuronal networks are more susceptible to this attentional imbalance  
353 between rejection and approval cues. Therefore, a combination of frequent and early  
354 rejection/criticism, paired with attentional wiring differences, may make ADHDers  
355 more vulnerable to rejection sensitivity.

356 Our findings aligned with previous literature, which found significant associations  
357 between rejection sensitivity and ADHD, with increased aggression and social  
358 anxiety (31, 32), higher levels of victim justice sensitivity and lower levels of  
359 perpetrator sensitivity (33), also withdrawal from social situations and relationships

360 (32, 34). Although a previous study investigated the experience of criticism in people  
361 with ADHD traits (29), our study was, to the best of our knowledge, the first to  
362 directly explore the experience of *rejection sensitivity* in ADHD individuals.

363 Although our method was successful for permitting rich and illustrative descriptions  
364 of the experience of rejection sensitivity, the sample size was small, and we did not  
365 screen for other neurodivergent conditions. During the interviews, two participants  
366 disclosed co-occurring Autism Spectrum Condition diagnoses, whilst another  
367 disclosed a Dyslexia diagnosis. Since ADHD is frequently accompanied by other  
368 conditions, participants may have had other diagnoses we were unaware of. Future  
369 research may be disposed to use a larger sample, and to screen for other conditions,  
370 in order to improve generalisability and validity. This may also elucidate the  
371 possibility that ADHD mediates associations between rejection sensitivity and other  
372 conditions which are also co-occurrent with ADHD, such as BPD. We hope that our  
373 findings improve understanding of neurodivergent experiences and highlight the  
374 need for further research into potential underlying mechanisms.

375



376 **Acknowledgments**

377 We thank all of our participants for their time and openness.

378 **Ethical approval statement**

379 All elements of this study were approved by the Brighton & Sussex Medical School  
380 Research Governance & Ethics Committee (approval no. ER/AR649/1) on July 10<sup>th</sup>,  
381 2022. The participants provided informed verbal consent before taking part.

382 **Declaration of conflicting interests**

383 The authors declare no conflicts of interest.

384 **Funding**

385 This study was funded partially by University of Sussex for a junior research  
386 associate summer programme.

387 **Data availability statement**

388 All relevant data are within the manuscript. Data cannot be shared publicly because  
389 we have no permission from the respondents of our study to share the de-identified  
390 dataset with the general public (Ethics committee: Research Governance and Ethics  
391 Committee at Brighton and Sussex Medical School (application no. ER/AR649/1).  
392 Data requests can be directed to the corresponding author.

393 **Figure Legends**

394 Figure 1. Graphic depicting the key themes in the analysis of rejection sensitivity in  
395 ADHD

396

397

## References

398

399 1. Retz W, Stieglitz RD, Corbisiero S, Retz-Junginger P, Rösler M. Emotional  
400 dysregulation in adult ADHD: what is the empirical evidence? *Expert Review*  
401 *of Neurotherapeutics*. 2012 Oct;12(10):1241–51.

402

403 2. Kapp SK, Gillespie-Lynch K, Sherman LE, Hutman T. Deficit, difference, or  
404 both? Autism and neurodiversity. *Developmental Psychology*. 2013;49(1):59–  
405 71.

406

407 3. Bottema-Beutel K, Kapp SK, Lester JN, Sasson NJ, Hand BN. Avoiding  
408 Ableist Language: Suggestions for Autism Researchers. *Autism in Adulthood*  
409 [Internet]. 2020 Sep 2;3(1):18–29.  
410 <https://www.liebertpub.com/doi/10.1089/aut.2020.0014>

411

412 4. Shaw P, Stringaris A, Nigg J, Leibenluft E. Emotion Dysregulation in Attention  
413 Deficit Hyperactivity Disorder. *American Journal of Psychiatry* [Internet]. 2014  
414 Mar;171(3):276–93. <https://www.ncbi.nlm.nih.gov/pmc/articles/PMC4282137/>

415

416 5. D’Agostino A, Covanti S, Rossi Monti M, Starcevic V. Reconsidering Emotion  
417 Dysregulation. *Psychiatric Quarterly*. 2017 Feb 14;88(4):807–25.

418

- 419 6. Hirsch O, Chavanon M, Riechmann E, Christiansen H. Emotional  
420 dysregulation is a primary symptom in adult Attention-Deficit/Hyperactivity  
421 Disorder (ADHD). *Journal of Affective Disorders*. 2018 May;232:41–7.  
422
- 423 7. Riley AW, Spiel G, Coghill D, Döpfner M, Falissard B, Lorenzo MJ, et al.  
424 Factors related to Health-Related Quality of Life (HRQoL) among children with  
425 ADHD in Europe at entry into treatment. *European Child & Adolescent  
426 Psychiatry*. 2006 Dec;15(S1):i38–45.  
427
- 428 8. Faraone SV, Rostain AL, Blader J, Busch B, Childress AC, Connor DF, et al.  
429 Practitioner Review: Emotional dysregulation in attention-deficit/hyperactivity  
430 disorder - implications for clinical recognition and intervention. *Journal of Child  
431 Psychology and Psychiatry*. 2018 Apr 6;60(2):133–50.  
432
- 433 9. Dodson W, M.D., LF-APA. New Insights Into Rejection Sensitive Dysphoria  
434 [Internet]. ADDitude. 2020. [https://www.additudemag.com/rejection-sensitive-  
435 dysphoria-adhd-emotional-dysregulation/](https://www.additudemag.com/rejection-sensitive-dysphoria-adhd-emotional-dysregulation/)  
436
- 437 10. Romero-Canyas R, Downey G, Berenson K, Ayduk O, Kang NJ. Rejection  
438 Sensitivity and the Rejection-Hostility Link in Romantic Relationships. *Journal  
439 of Personality*. 2010 Feb;78(1):119–48.  
440

- 441 11. Dodson W. RSD: How Rejection Sensitive Dysphoria Feels for Adults with  
442 ADHD [Internet]. [www.additudemag.com](http://www.additudemag.com). 2023 [cited 2023 Sep 19].  
443 <https://www.additudemag.com/rsd-rejection-sensitive-dysphoria-experiences/>  
444
- 445 12. Feldman S, Downey G. Rejection sensitivity as a mediator of the impact of  
446 childhood exposure to family violence on adult attachment behavior.  
447 *Development and Psychopathology*. 1994;6(1):231–47.  
448
- 449 13. Downey G, Feldman SI. Implications of rejection sensitivity for intimate  
450 relationships. *Journal of Personality and Social Psychology* [Internet]. 1996  
451 Jun 1;70(6):1327–43.  
452 [https://pubmed.ncbi.nlm.nih.gov/8667172/#:~:text=Study%203%20shows%20](https://pubmed.ncbi.nlm.nih.gov/8667172/#:~:text=Study%203%20shows%20that%20people)  
453 [that%20people](https://pubmed.ncbi.nlm.nih.gov/8667172/#:~:text=Study%203%20shows%20that%20people)  
454
- 455 14. Gao S, Assink M, Cipriani A, Lin K. Associations between rejection sensitivity  
456 and mental health outcomes: A meta-analytic review. *Clinical Psychology*  
457 *Review*. 2017 Nov;57:59–74.  
458
- 459 15. Beaton DM, Sirois F, Milne E. Experiences of criticism in adults with ADHD: A  
460 qualitative study. Fernández-Alcántara M, editor. *PLOS ONE* [Internet]. 2022  
461 Feb 18;17(2):e0263366.  
462 <https://journals.plos.org/plosone/article?id=10.1371/journal.pone.0263366>  
463

- 464 16. Braun V, Clarke V. Using thematic analysis in psychology. [Internet].  
465 psycnet.apa.org. 2006. <https://psycnet.apa.org/record/2006-06991-002>  
466
- 467 17. Pearson A, Rose K. A Conceptual Analysis of Autistic Masking:  
468 Understanding the Narrative of Stigma and the Illusion of Choice. *Autism in*  
469 *Adulthood* [Internet]. 2021 Jan 22;3(1).  
470 <https://www.liebertpub.com/doi/10.1089/aut.2020.0043>  
471
- 472 18. Stickley A, Koyanagi A, Takahashi H, Ruchkin V, Kamio Y. Attention-  
473 deficit/hyperactivity disorder symptoms and loneliness among adults in the  
474 general population. *Research in Developmental Disabilities*. 2017  
475 Mar;62:115–23.  
476
- 477 19. Bradley L, Shaw R, Baron-Cohen S, Cassidy S. Autistic Adults' Experiences  
478 of Camouflaging and Its Perceived Impact on Mental Health. *Autism in*  
479 *Adulthood* [Internet]. 2021 Jun 3;3(4).  
480 <https://www.liebertpub.com/doi/full/10.1089/aut.2020.0071>  
481
- 482 20. Houghton S, Lawrence D, Hunter SC, Zadow C, Kyron M, Paterson R, et al.  
483 Loneliness Accounts for the Association Between Diagnosed Attention Deficit-  
484 Hyperactivity Disorder and Symptoms of Depression Among Adolescents.  
485 *Journal of Psychopathology and Behavioral Assessment*. 2020 Jan  
486 31;42(2):237–47.

487

488 21. Hariri AG, Gulec MY, Oregul FFC, Sumbul EA, Elbay RY, Gulec H.  
489 Dissociation in bipolar disorder: Relationships between clinical variables and  
490 childhood trauma. *Journal of Affective Disorders*. 2015 Sep;184:104–10.

491

492 22. Krause-Utz A. Dissociation, trauma, and borderline personality disorder.  
493 *Borderline Personality Disorder and Emotion Dysregulation*. 2022 Apr 19;9(1).

494

495 23. Matthies SD, Philipsen A. Common ground in Attention Deficit Hyperactivity  
496 Disorder (ADHD) and Borderline Personality Disorder (BPD)—review of recent  
497 findings. *Borderline Personality Disorder and Emotion Dysregulation*.  
498 2014;1(1):3.

499

500 24. Schiweck C, Arteaga-Henriquez G, Aichholzer M, Thanarajah SE, Vargas-  
501 Cáceres S, Matura S, et al. Comorbidity of ADHD and adult bipolar disorder:  
502 A systematic review and meta-analysis. *Neuroscience & Biobehavioral*  
503 *Reviews*. 2021 Jan;124.

504

505 25. Brüne M. Borderline Personality Disorder. *Evolution, Medicine, and Public*  
506 *Health*. 2016;2016(1):52–66.

507

508 26. Littman E. ADHD and BPD: Borderline Personality Disorder’s Link to ADD  
509 [Internet]. [www.additudemag.com](http://www.additudemag.com). 2023 [cited 2024 Feb 20].

510 [https://www.additudemag.com/adhd-and-bpd-women-borderline-personality-](https://www.additudemag.com/adhd-and-bpd-women-borderline-personality-disorder/#:~:text=Because%20ADHD%20was%20rarely%20diagnosed)  
511 [disorder/#:~:text=Because%20ADHD%20was%20rarely%20diagnosed](https://www.additudemag.com/adhd-and-bpd-women-borderline-personality-disorder/#:~:text=Because%20ADHD%20was%20rarely%20diagnosed)  
512  
513 27. Robertson D. Primer on the autonomic nervous system. 2nd ed. Amsterdam ;  
514 Boston: Elsevier Academic Press; 2004.  
515  
516 28. Mueller AK, Fuermaier ABM, Koerts J, Tucha L. Stigma in attention deficit  
517 hyperactivity disorder. ADHD Attention Deficit and Hyperactivity Disorders  
518 [Internet]. 2012 Jul 8;4(3):101–14.  
519 <https://www.ncbi.nlm.nih.gov/pmc/articles/PMC3430836/>  
520  
521 29. Beaton DM, Sirois F, Milne E. Self-compassion and Perceived Criticism in  
522 Adults with Attention Deficit Hyperactivity Disorder (ADHD). Mindfulness.  
523 2020 Aug 19;  
524  
525 30. Babinski DE, Kujawa A, Kessel EM, Arfer KB, Klein DN. Sensitivity to Peer  
526 Feedback in Young Adolescents with Symptoms of ADHD: Examination of  
527 Neurophysiological and Self-Report Measures. Journal of Abnormal Child  
528 Psychology. 2018 Aug 29;47(4):605–17.  
529  
530 31. KOYUNCU A, ÇELEBI F, ERTEKIN E, MEMİŞ ÇÖ, TÜKEL R. The Presence  
531 of Childhood Attention Deficit/Hyperactivity Disorder May Be Associated With

- 532 Interpersonal Sensitivity in Patients With Social Anxiety Disorder. *Journal of*  
533 *Psychiatric Practice*. 2017 Jul;23(4):254–9.
- 534
- 535 32. Motamedi M, Bierman K, Huang-Pollock CL. Rejection Reactivity, Executive  
536 Function Skills, and Social Adjustment Problems of Inattentive and  
537 Hyperactive Kindergarteners. *Social Development*. 2015 Jul 14;25(2):322–39.
- 538
- 539 33. Bondü R, Esser G. Justice and rejection sensitivity in children and  
540 adolescents with ADHD symptoms. *European Child & Adolescent Psychiatry*  
541 [Internet]. 2014 May 31;24(2):185–98.  
542 <https://link.springer.com/article/10.1007/s00787-014-0560-9>
- 543
- 544 34. Narimani M, Aghajani S, Mohsenpour Z. Comparing group participation and  
545 rejection sensitivity in the students with or without learning disorders. *Journal*  
546 *of Learning Disabilities* [Internet]. 2020 Nov 21 [cited 2023 Oct 4];10(1):187–  
547 99. [https://jld.uma.ac.ir/article\\_1051\\_en.html?lang=en](https://jld.uma.ac.ir/article_1051_en.html?lang=en)
- 548



## Masking

Masking: when someone acts in a different way to camouflages specific traits, often in the way which is more accepted by society (3). Participants use masking as a tool to hide their over-sensitivity.

Masking causes others to view participants as tougher than they really are. They described how this led to further rejection and criticism, creating a vicious cycle, and reinforcing the 'tough' exterior mask.

Consistent masking has led to a dissociation within participants; causing them to feel unsure of what their true feelings really are.

"Mask of toughness"

"Vicious Cycle"

"MASKING WITH YOURSELF"

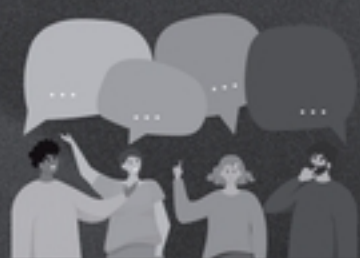

## Withdrawal

Participants expect rejection, causing them to withdraw - such as avoiding university work, and withdrawing from friendships, and romantic relationships.

Socially withdrawing reinforces the idea that others are correct to reject them. This leads them to question if there is something wrong with them, causing them to only keep small circles of trusted people.

"FRIENDLESS"

"Lonely"

"Unlovable"

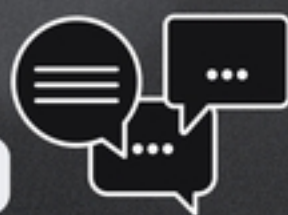

## Bodily Sensations

Participants explained how rejection and criticism evokes unpleasant and overwhelming physical sensations.

"feels like a chairs been taken out from beneath you"

"You know the hand warmers... when you click, it becomes solid and warm... everything inside me starts to burn"

"paralysed state"

"nauseas"

"pinch in your heart"

Figure 1
